# Supplementary material for: TRMT2B is responsible for both tRNA and rRNA m5U-methylation in human mitochondria
Source: PubMed Central journal article supplement (PMC7237155; doi:10.1080/15476286.2020.1712544), 2020-01-17
Supplement: krnb-17-04-1712544-s001.pdf [file krnb-17-04-1712544-s001.pdf]

## SUPPLEMENTAL FIGURES

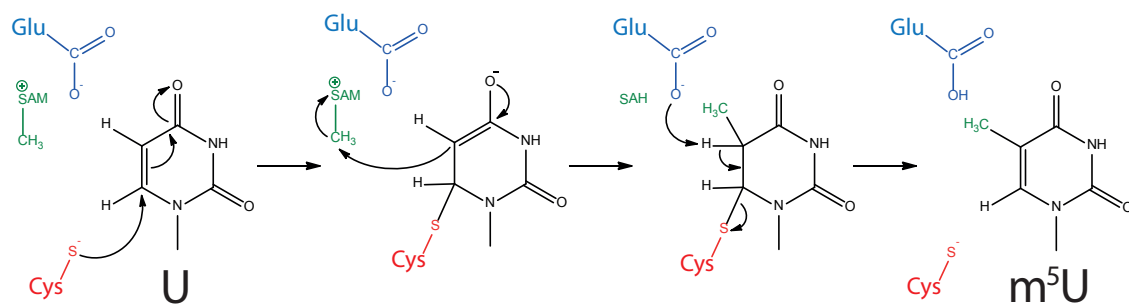

**Figure S1: The catalytic mechanism of m<sup>5</sup>U-methyltransferases**, showing the involvement of the nucleophilic cysteine, the proton extracting glutamate, and S-adenosylmethionine (SAM).

A

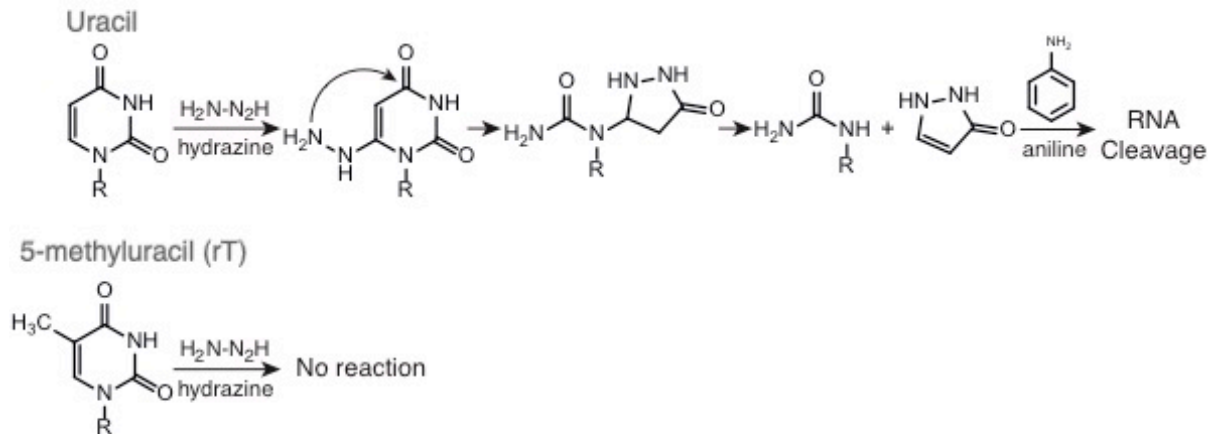

B

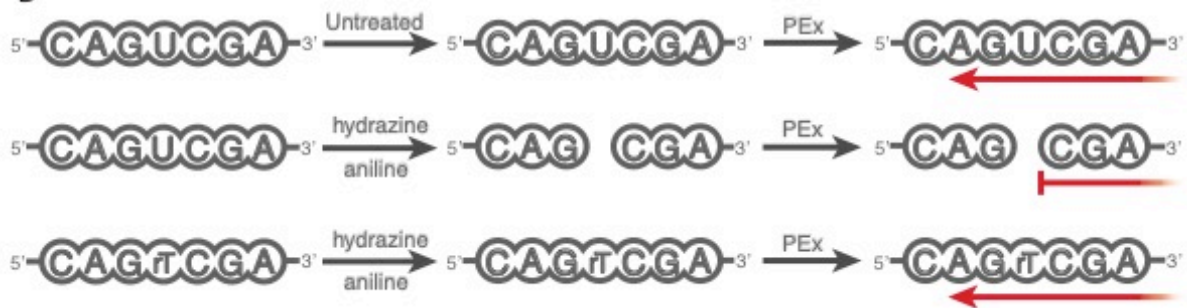

**Figure S2: Detection of 5-methyluridine in RNA (a)** The hydrazinolysis of uracil in RNA is mediated through the nucleophilic attack of C6 by hydrazine, and the subsequent reaction with C4, forming a pyrazole which is spontaneously cleaved from the glycosidic nitrogen. The resulting abasic site is susceptible to  $\beta$ -elimination at both the 3' and 5' phosphates in the presence of aniline. A methyl group at C5 protects the pyrimidine ring from nucleophilic attack, and therefore subsequent strand cleavage at this position **(b)** Primer extension (red arrow) following Hydrazine-Aniline treatment will result in stalled extension products corresponding to unmodified uracils in the original sequence, whereas primers will read through  $m^5U$ . These products are then separated through gel electrophoresis.

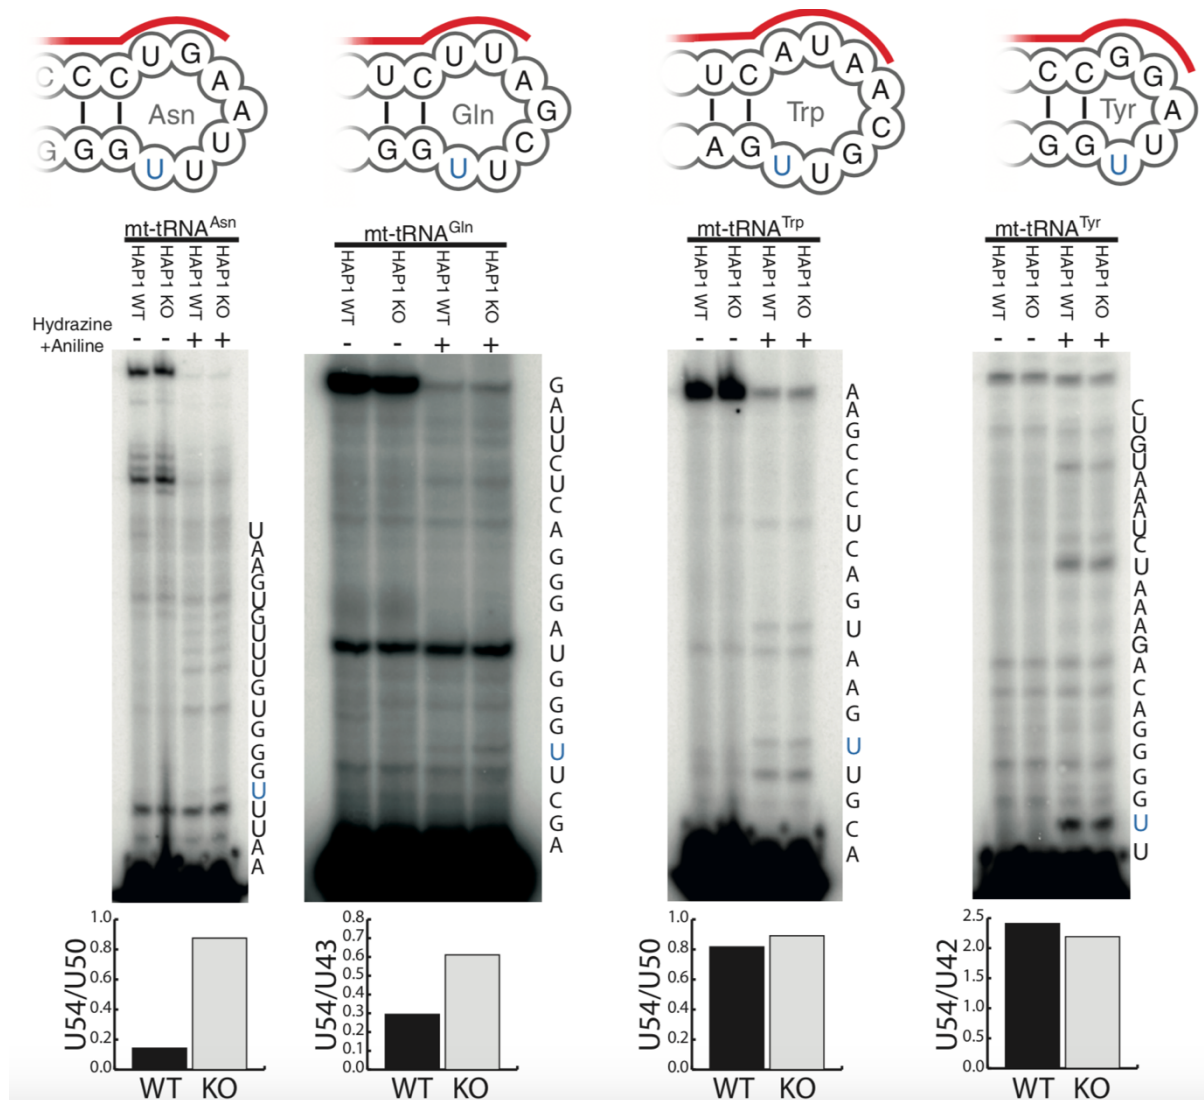

**Figure S3: Identification of TRMT2B catalysed m<sup>5</sup>U54 in mt-tRNAs.** RT-PEX reactions performed and quantified as in **Figure 3** using [<sup>32</sup>P]-end labelled primers complementary to the corresponding sequences in mt-tRNA<sup>Asn</sup>, mt-tRNA<sup>Gln</sup>, mt-tRNA<sup>Trp</sup>, and mt-tRNA<sup>Tyr</sup>.

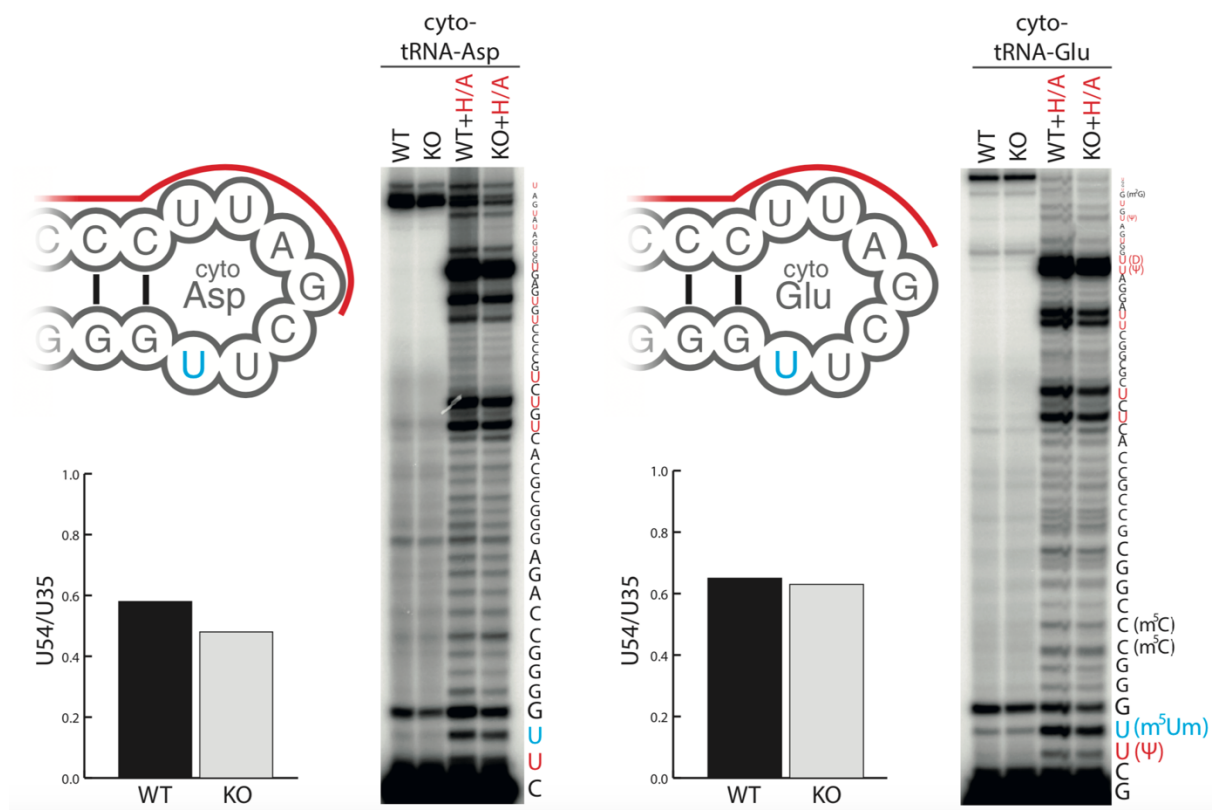

**Figure S4: Absence of TRMT2B catalysed m<sup>5</sup>U54 in cyto-tRNAs.** RT-PEX reactions performed and quantified as in **Figure 3** using [<sup>32</sup>P]-end labelled primers complementary to the corresponding sequences in cyto-tRNA<sup>Asp</sup> and cyto-tRNA<sup>Glu</sup>.
